# Supplementary material for: Cysteines are critical determinants of spontaneous and seeded tau aggregation in cells
Source: Research Square preprint supplement (doi:10.21203/rs.3.rs-9217102/v1), 2026-04-23
Supplement: Supplementary file 1 [file d02dabe6d1bd8f24a3458a91.xlsx]

## Sheet: Fig. 1b
Time	S320F295-330
0	1	0	0
0.2	3	3	2
0.3	1	2	2
0.5	2	3	1
0.7	1	1	2
0.8	5	4	3
1	2	3	3
1.2	3	3	1
1.3	3	3	2
1.5	2	4	1
1.7	2	3	3
1.8	3	4	3
2	2	4	2
2.2	4	2	1
2.3	3	5	2
2.5	3	3	3
2.7	6	5	3
2.8	7	4	5
3	6	6	3
3.2	7	5	6
3.3	8	7	7
3.5	10	9	7
3.7	13	9	11
3.8	15	13	15
4	19	17	14
4.2	23	18	20
4.3	29	22	23
4.5	32	24	24
4.7	37	28	31
4.8	42	31	36
5	46	41	41
5.2	51	45	44
5.3	60	49	50
5.5	66	53	51
5.7	74	57	56
5.8	83	63	56
6	82	68	63
6.2	88	67	73
6.3	91	75	74
6.5	103	75	74
6.7	106	80	77
6.8	111	82	85
7	109	90	86
7.2	112	91	88
7.3	122	93	88
7.5	123	93	89
7.7	120	92	89
7.8	119	96	91
8	119	95	87
8.2	120	92	89
8.3	118	94	88
8.5	118	94	89
8.7	109	93	83
8.8	115	93	81
9	121	96	84
9.2	114	94	78
9.3	111	93	76
9.5	111	88	82
9.7	112	91	76
9.8	110	86	74
10	108	85	69
10.2	109	88	75
10.3	104	85	75
10.5	106	86	76
10.7	108	80	75
10.8	102	88	69
11	103	82	70
11.2	98	76	71
11.3	101	80	72
11.5	102	77	67
11.7	98	76	68
11.8	96	74	66
12	97	73	63
12.2	93	74	65
12.3	93	71	63
12.5	100	71	62
12.7	93	74	64
12.8	91	73	65
13	94	74	61
13.2	93	75	61
13.3	92	71	59
13.5	87	71	60
13.7	88	76	62
13.8	91	74	62
14	90	75	62
14.2	94	72	60
14.3	90	72	62
14.5	90	72	59
14.7	88	68	57
14.8	93	72	58
15	88	74	58
15.2	94	74	62
15.3	98	68	56
15.5	91	68	61
15.7	95	77	58
15.8	94	75	59
16	95	70	57
16.2	99	71	54
16.3	96	78	48
16.5	97	73	51
16.7	94	76	46
16.8	87	78	44
17	96	78	42
17.2	98	76	44
17.3	100	73	49
17.5	100	72	42
17.7	97	73	45
17.8	101	74	40
18	95	77	44
18.2	98	75	41
18.3	100	71	40
18.5	99	76	45
18.7	97	73	41
18.8	104	76	37
19	99	79	34
19.2	98	78	38
19.3	103	76	37
19.5	106	79	39
19.7	99	79	41
19.8	101	77	39
20	102	76	42
20.2	99	74	37
20.3	100	76	33
20.5	103	81	38
20.7	101	78	40
20.8	101	76	36
21	101	74	35
21.2	104	79	37
21.3	99	77	42
21.5	101	79	38
21.7	100	82	39
21.8	101	80	41
22	102	85	37
22.2	99	86	39
22.3	98	76	38
22.5	100	82	37
22.7	104	84	40
22.8	102	79	39
23	96	78	40
23.2	98	81	39
23.3	100	88	39
23.5	103	88	40
23.7	102	80	41
23.8	102	83	36
24	106	85	38

## Sheet: Supp. Fig. 2a-e
Time	10uM S320F_TCEP				15uM S320F_TCEP				20uM S320F_TCEP				10uM C322S				15uM C322S				20uM C322S				10uM_noTCEP				15uM_noTCEP				20uM_noTCEP
0	10	6	6		6	6	8		5	6	8		5	5	7		5	5	6		5	5	7		24	27	19		45	32	30		55	48	44
0.2	9	8	5		6	6	7		5	5	9		5	5	6		5	5	5		5	6	6		27	26	19		46	32	30		52	45	45
0.3	8	6	5		6	5	6		5	5	10		5	5	5		5	4	4		5	6	5		28	26	17		42	32	30		52	42	45
0.5	9	6	5		5	6	6		6	5	10		6	7	5		6	5	4		4	6	5		28	28	18		43	30	29		51	41	44
0.7	6	5	6		5	5	6		5	5	10		4	5	5		4	4	5		5	5	4		28	30	17		42	28	29		52	37	45
0.8	7	6	6		6	5	6		5	5	11		5	5	5		4	4	6		5	4	5		29	27	14		41	30	26		51	56	45
1	7	5	6		5	5	7		5	6	10		4	5	5		5	4	5		4	5	5		29	25	14		45	26	28		48	56	40
1.2	7	6	5		6	6	6		6	6	12		5	5	5		5	5	6		5	5	5		28	26	16		43	28	26		45	61	41
1.3	7	5	6		5	5	7		5	6	10		5	5	5		5	5	5		4	5	5		28	23	15		41	28	26		41	60	42
1.5	7	6	6		6	5	6		5	5	12		4	5	5		4	6	5		5	5	5		28	25	14		43	27	23		42	59	37
1.7	7	6	6		5	5	6		6	5	11		6	4	5		6	5	5		5	4	5		29	23	14		40	27	25		39	56	34
1.8	9	6	7		6	6	7		6	7	11		6	6	6		5	5	5		5	6	5		29	25	14		47	26	24		42	56	35
2	7	6	7		7	5	7		6	7	11		5	5	6		5	6	6		6	5	6		27	27	15		43	26	22		42	50	33
2.2	8	7	7		6	6	7		6	6	11		5	4	5		5	4	6		6	6	6		28	22	13		43	25	24		39	53	32
2.3	7	6	7		7	6	10		5	7	10		5	6	5		5	5	7		5	5	7		26	24	13		40	24	22		39	50	33
2.5	7	5	7		7	7	9		6	7	10		5	6	6		6	5	6		5	6	6		26	24	13		38	25	22		38	50	31
2.7	8	6	7		6	6	14		7	7	11		6	5	7		5	6	8		6	7	6		26	22	12		36	24	22		36	47	30
2.8	8	7	6		6	7	12		7	8	12		6	5	8		6	6	9		6	6	7		22	23	12		40	23	22		35	46	31
3	8	7	7		7	6	16		6	5	12		6	5	6		6	5	9		6	6	7		23	24	13		37	24	22		37	47	31
3.2	9	8	6		6	7	20		8	7	12		7	6	8		6	6	10		7	6	7		23	25	11		38	23	23		36	46	29
3.3	9	7	6		7	6	19		6	7	14		6	6	8		6	7	11		6	6	7		24	22	11		36	23	21		37	48	28
3.5	9	7	8		7	6	21		7	7	20		7	7	10		6	6	14		7	7	8		24	23	10		34	21	21		35	45	29
3.7	8	7	8		8	6	21		8	8	42		8	9	9		6	6	15		7	7	8		22	22	11		36	22	20		36	45	29
3.8	9	8	8		6	8	22		8	7	26		7	6	11		7	6	15		8	8	9		24	23	10		36	22	20		33	45	28
4	9	7	8		7	7	22		10	7	42		9	7	10		7	7	18		12	9	10		22	21	11		34	22	18		38	44	29
4.2	8	7	7		7	6	19		12	7	36		8	7	8		6	7	18		13	10	11		21	20	11		30	22	20		35	42	29
4.3	8	8	8		11	7	24		12	9	62		8	8	10		8	6	22		17	11	11		23	19	11		33	22	19		34	45	28
4.5	9	7	7		16	6	23		18	8	61		8	9	11		7	7	26		28	18	16		21	22	9		33	21	22		34	44	28
4.7	11	8	6		13	6	23		30	10	87		10	7	10		11	9	40		41	25	20		23	22	10		28	21	19		35	44	29
4.8	14	7	7		13	6	21		64	10	117		8	9	10		13	12	58		85	63	25		21	21	10		29	23	20		34	44	27
5	12	7	6		16	5	25		47	13	94		10	10	12		19	15	88		114	119	39		24	20	11		33	20	22		36	43	27
5.2	16	7	7		12	6	26		98	16	142		10	9	14		21	28	120		157	134	48		21	23	9		31	24	21		37	44	28
5.3	17	8	6		17	6	27		129	19	109		14	10	14		26	45	152		187	171	77		23	20	11		31	22	19		36	43	28
5.5	18	8	6		16	7	31		148	28	159		15	14	20		33	65	186		245	226	122		23	21	10		30	21	20		34	44	27
5.7	14	12	8		25	5	35		172	38	178		18	10	23		53	89	229		278	280	155		21	22	9		30	21	20		37	43	29
5.8	17	12	6		29	8	41		210	50	174		24	13	43		91	123	256		312	329	218		21	20	10		29	22	19		35	42	26
6	17	12	7		15	10	49		232	47	189		41	26	40		120	160	286		350	359	228		22	20	9		31	23	20		36	42	28
6.2	19	15	6		27	9	57		253	66	215		38	38	60		154	193	306		385	410	304		21	18	9		32	21	19		33	45	28
6.3	20	18	6		45	19	65		294	91	228		105	53	75		182	246	362		420	443	385		21	22	10		34	22	18		35	43	28
6.5	21	16	7		32	29	75		297	108	232		81	51	90		244	307	382		450	530	408		22	19	9		36	20	20		38	42	27
6.7	19	29	7		34	40	96		318	116	238		124	116	138		253	353	402		480	515	522		22	21	10		38	21	20		36	41	27
6.8	21	25	6		71	56	108		337	141	229		132	110	172		340	382	432		480	572	449		23	19	10		35	21	19		34	43	25
7	21	52	9		75	51	114		343	159	229		202	189	227		367	428	457		498	587	565		22	20	8		35	22	20		35	41	26
7.2	20	55	10		67	42	132		350	196	223		201	133	238		399	457	503		516	581	590		22	16	9		34	21	20		34	42	26
7.3	20	56	8		90	55	145		368	174	233		249	191	275		439	484	548		546	605	611		21	20	9		31	21	18		36	43	25
7.5	19	63	8		90	69	152		377	219	230		257	214	278		452	514	571		583	679	652		23	20	8		39	20	19		36	44	26
7.7	22	74	9		113	125	175		369	183	215		295	223	305		494	560	575		570	747	679		22	19	7		32	21	19		37	42	27
7.8	21	63	9		87	122	165		367	215	230		334	286	341		528	548	629		571	789	650		20	22	8		44	19	19		37	41	28
8	20	85	10		138	121	175		389	230	223		341	297	337		553	577	618		575	806	660		18	20	9		38	20	18		36	42	27
8.2	23	93	9		119	162	188		382	245	223		384	321	352		560	552	663		596	811	682		21	19	9		39	21	19		36	44	27
8.3	26	82	9		198	169	181		385	268	225		366	368	372		574	559	636		591	804	673		21	19	10		45	20	19		38	42	26
8.5	35	95	10		124	170	182		388	270	220		399	368	358		581	537	698		572	812	668		20	19	8		47	22	22		35	48	28
8.7	64	99	13		133	202	177		372	278	217		396	404	379		591	558	682		558	780	654		19	21	9		53	20	19		38	44	30
8.8	95	88	11		151	232	205		384	267	218		405	405	367		616	527	704		586	798	660		21	20	10		53	20	20		37	42	26
9	116	108	13		163	240	190		381	281	217		404	452	376		613	547	704		553	808	666		21	19	9		53	21	21		36	46	28
9.2	133	97	11		164	247	184		385	292	215		423	428	369		629	521	703		540	803	642		18	19	9		56	20	18		37	45	28
9.3	145	113	13		158	247	182		370	281	209		415	463	368		628	521	729		556	782	634		21	20	7		57	21	21		35	46	25
9.5	148	105	13		176	243	193		375	286	210		429	458	368		645	497	695		545	779	626		20	20	10		61	23	19		35	50	28
9.7	149	104	19		141	237	202		365	291	211		446	496	359		637	495	737		545	799	610		19	18	9		60	25	19		36	50	26
9.8	158	130	21		196	224	184		367	296	206		423	474	363		636	482	721		517	763	616		21	19	8		67	26	20		36	52	26
10	156	126	39		163	214	176		368	274	206		453	517	347		636	496	698		530	753	590		21	21	8		68	26	20		38	51	27
10.2	170	111	56		199	237	177		362	297	201		446	486	353		643	468	723		479	772	590		19	21	10		69	30	21		38	55	26
10.3	176	127	67		190	234	194		355	277	199		440	529	344		631	474	682		501	735	594		20	19	9		67	32	19		35	57	28
10.5	189	145	74		158	229	197		356	290	197		453	528	336		627	471	715		486	740	580		20	19	8		73	29	19		38	55	29
10.7	198	115	69		198	220	177		352	274	202		441	506	341		623	445	723		478	724	591		21	21	8		70	30	21		39	63	27
10.8	200	115	68		176	213	173		354	274	196		450	532	329		614	447	677		491	734	577		20	20	9		73	33	20		37	78	28
11	209	139	80		159	215	175		354	291	195		441	503	324		626	453	701		470	717	573		20	19	9		78	38	20		37	69	28
11.2	209	140	87		188	220	191		353	269	193		443	533	317		605	424	690		485	715	563		19	20	9		79	49	23		40	65	28
11.3	210	113	79		169	216	171		351	277	189		429	515	320		631	428	710		449	721	563		22	19	9		76	52	22		37	68	28
11.5	209	135	76		186	236	171		345	268	188		431	516	330		593	432	693		457	711	545		21	20	9		78	59	20		39	80	26
11.7	210	144	95		183	247	171		341	265	186		436	545	316		618	416	681		446	713	535		22	20	10		82	69	23		38	98	29
11.8	204	116	94		155	249	173		339	275	181		431	510	315		599	408	697		438	697	542		20	21	10		76	66	23		41	94	28
12	210	130	81		183	251	169		333	257	180		424	546	307		601	426	682		445	710	526		21	19	9		77	62	23		43	90	31
12.2	196	153	83		166	236	167		335	268	182		432	512	309		590	408	673		437	682	530		22	20	11		79	65	22		41	109	29
12.3	197	124	104		172	239	175		335	263	179		420	539	299		608	398	669		442	695	510		20	21	10		83	65	26		40	106	28
12.5	191	119	102		172	233	162		338	255	170		406	518	302		588	402	663		429	702	512		21	20	10		80	72	30		41	113	26
12.7	187	148	80		159	226	158		330	259	174		419	542	285		581	396	671		437	677	527		20	17	10		80	66	35		43	101	29
12.8	182	131	98		178	212	171		334	250	170		409	515	282		591	398	646		435	664	515		21	18	9		80	65	41		42	103	29
13	191	112	111		159	215	168		328	258	168		405	532	281		578	386	641		422	667	500		19	20	10		84	64	44		42	97	27
13.2	186	145	92		178	204	156		326	246	164		406	521	284		574	379	638		421	651	493		23	20	9		82	58	47		43	85	28
13.3	182	144	79		155	195	160		313	247	167		394	510	276		578	386	643		403	656	495		21	19	10		85	50	49		50	93	29
13.5	177	110	102		190	197	159		315	237	164		407	511	285		573	382	654		397	647	502		20	20	10		84	62	45		54	93	27
13.7	177	147	107		156	208	151		315	252	165		381	505	258		571	370	636		395	649	508		21	20	10		88	67	49		59	90	28
13.8	181	139	85		184	202	157		322	247	165		394	506	265		568	384	655		391	650	521		23	16	9		83	70	47		67	100	27
14	170	117	94		167	202	155		312	245	163		394	499	258		553	362	628		388	646	501		20	19	9		84	70	51		70	95	27
14.2	170	150	117		176	199	153		316	237	167		383	494	262		553	368	632		390	637	493		22	21	10		85	70	51		64	94	29
14.3	165	127	109		158	203	157		308	245	156		384	493	264		542	367	637		400	634	480		22	19	9		88	71	50		71	97	27
14.5	160	125	81		134	206	150		301	236	163		388	493	259		549	363	619		411	627	494		23	20	11		87	73	45		70	97	29
14.7	157	147	105		184	212	152		302	229	161		377	488	255		552	358	630		405	629	494		23	20	11		89	71	43		70	93	30
14.8	156	112	126		153	217	152		300	229	154		372	490	250		552	359	619		402	626	495		22	21	10		87	73	34		67	95	29
15	151	130	103		147	213	149		310	231	153		367	477	253		554	355	620		397	625	479		23	19	10		85	73	36		69	93	28
15.2	152	141	85		178	212	147		295	222	155		365	476	254		545	354	605		382	623	472		22	19	12		88	74	36		65	94	31
15.3	148	104	110		139	214	150		299	225	163		356	478	249		538	365	615		377	621	481		22	19	11		92	72	42		60	97	28
15.5	150	132	112		176	208	144		303	218	156		350	488	248		551	359	607		372	622	493		20	21	12		87	74	45		52	92	29
15.7	149	133	90		150	211	146		299	219	150		357	487	247		530	359	596		353	603	482		21	19	13		85	77	51		44	90	28
15.8	148	112	93		148	213	144		289	224	152		342	470	245		531	339	605		379	616	487		23	20	13		89	77	57		41	88	28
16	146	132	115		172	204	143		296	222	155		345	460	240		529	347	594		363	637	477		21	20	11		90	78	51		41	88	29
16.2	147	130	106		135	205	140		287	214	156		344	466	236		518	348	606		363	625	473		21	18	12		89	79	46		44	93	28
16.3	140	108	83		170	197	145		297	217	159		336	471	243		526	341	587		372	604	473		21	20	11		89	76	43		45	90	27
16.5	145	116	101		134	194	141		292	210	156		339	456	238		525	339	580		372	610	479		21	21	14		91	79	47		42	90	27
16.7	145	128	112		164	195	139		288	214	157		333	463	237		523	343	589		369	604	468		22	20	11		87	81	51		45	84	27
16.8	138	105	96		132	191	140		283	218	150		329	453	229		509	331	581		375	606	471		23	20	12		91	78	49		45	93	25
17	140	114	85		176	190	138		276	212	152		332	461	236		508	333	581		360	613	466		21	20	13		88	85	51		45	86	28
17.2	139	128	99		130	183	136		281	203	146		335	455	232		512	331	586		354	598	458		22	22	15		91	81	50		46	86	28
17.3	133	112	107		175	178	131		275	211	150		325	457	236		495	326	574		357	616	465		20	19	13		91	78	49		44	88	27
17.5	136	104	86		132	177	136		284	206	149		333	458	227		504	324	567		351	597	473		21	20	13		88	79	50		45	85	25
17.7	134	111	83		170	173	132		276	202	150		324	448	220		494	325	569		359	590	472		20	20	13		89	82	53		45	84	28
17.8	130	122	93		127	173	139		273	207	149		324	455	220		502	325	565		365	590	457		22	22	12		91	79	56		44	89	28
18	134	103	98		171	170	138		270	197	148		317	454	220		491	320	563		353	590	451		24	22	13		87	83	53		44	87	27
18.2	132	112	81		132	176	137		272	195	147		318	448	219		498	324	549		355	583	454		23	21	13		92	83	59		47	90	28
18.3	130	125	86		179	172	128		271	197	144		321	438	215		497	318	554		359	593	455		21	24	12		96	81	61		45	85	26
18.5	130	106	93		133	170	134		270	195	145		319	431	215		481	317	567		352	580	456		24	21	13		90	80	58		45	85	27
18.7	126	102	94		164	168	129		263	187	143		310	427	213		487	311	556		353	576	452		23	23	15		86	86	57		48	88	28
18.8	122	116	74		147	164	130		254	196	141		314	440	219		485	312	552		359	581	444		23	24	15		92	84	59		46	87	29
19	119	105	82		137	171	130		261	199	144		308	442	209		465	318	556		347	573	443		23	26	16		90	81	55		51	83	27
19.2	116	101	94		150	163	130		251	188	137		304	443	212		481	322	547		353	566	432		25	26	18		91	82	57		51	83	27
19.3	117	114	85		127	170	122		264	185	144		298	436	211		477	317	553		338	588	438		25	26	20		92	83	60		50	85	28
19.5	116	108	74		156	172	127		262	191	137		307	436	212		469	314	548		344	555	444		27	26	19		93	81	62		46	86	28
19.7	116	96	85		121	174	125		261	185	140		297	419	209		474	311	542		347	561	447		26	29	20		89	82	59		52	82	29
19.8	113	107	97		151	173	126		259	179	135		302	432	206		465	306	543		339	576	440		27	29	21		89	84	59		54	86	27
20	110	111	83		118	169	122		257	188	137		293	419	209		468	302	528		336	553	443		26	29	23		93	83	60		53	83	29
20.2	109	92	74		149	171	123		249	184	131		303	431	207		462	307	533		339	552	439		30	28	20		93	79	58		58	82	27
20.3	107	99	87		124	170	122		254	178	130		302	419	201		463	313	527		350	567	433		27	26	23		89	80	58		52	82	28
20.5	107	104	95		140	164	124		247	183	132		303	419	205		454	303	525		334	561	431		30	29	21		91	83	57		50	84	28
20.7	109	90	80		122	162	121		254	177	130		295	421	204		458	304	524		348	550	415		29	29	22		92	82	57		50	81	27
20.8	106	89	71		124	165	125		250	186	127		300	407	202		448	297	530		333	554	436		28	28	21		89	82	57		54	82	29
21	113	105	87		135	160	121		253	181	124		288	424	198		444	302	517		337	544	438		31	29	23		92	81	56		52	85	30
21.2	109	94	90		116	158	119		243	177	124		300	408	205		447	296	525		341	546	428		29	29	25		91	85	58		61	79	28
21.3	107	91	82		140	161	117		243	180	123		290	418	203		447	303	511		321	550	429		30	31	25		92	86	62		56	80	30
21.5	108	97	67		114	160	119		239	174	124		301	419	197		444	292	524		347	550	425		31	29	25		88	85	62		57	84	29
21.7	105	93	80		121	155	118		233	174	128		281	406	205		441	301	517		323	533	420		31	30	27		91	82	63		61	77	29
21.8	100	89	90		134	160	119		239	179	120		288	424	200		447	296	510		331	558	422		33	31	29		91	83	57		59	81	29
22	96	98	83		113	151	118		230	178	123		283	400	201		436	289	519		325	561	419		32	32	29		91	83	59		64	82	30
22.2	96	88	70		129	146	117		235	169	125		283	408	198		442	287	499		315	551	417		35	34	28		91	83	61		62	80	29
22.3	93	86	79		128	151	124		235	167	120		284	409	200		437	289	511		315	546	422		34	34	29		90	81	65		66	82	29
22.5	95	97	90		115	151	117		241	171	120		275	379	191		430	291	523		326	552	427		35	34	28		92	83	62		68	81	29
22.7	94	88	79		131	145	116		237	168	122		282	397	197		429	283	501		323	543	432		32	34	30		90	79	62		73	82	28
22.8	94	90	67		113	149	115		229	167	117		282	408	189		438	282	517		305	544	429		34	33	28		89	80	64		68	81	30
23	92	93	80		118	143	113		233	164	122		271	387	191		427	285	499		328	543	425		36	35	27		92	85	64		64	79	30
23.2	92	82	82		124	149	116		230	164	120		277	401	202		428	290	506		310	541	420		36	36	27		92	82	64		62	80	32
23.3	92	92	71		110	151	117		235	169	116		271	395	188		425	281	506		321	529	416		36	37	25		91	82	63		69	77	32
23.5	85	82	68		111	145	118		229	169	113		278	384	197		426	279	495		308	534	409		34	36	29		86	86	66		72	80	31
23.7	94	86	73		129	151	117		226	165	121		271	402	189		413	280	506		310	553	411		35	36	30		91	82	65		66	77	33
23.8	90	87	83		105	145	110		235	160	114		270	386	198		420	284	500		307	537	421		35	36	29		92	81	66		62	79	32
24	90	84	73		114	147	116		230	161	120		272	377	190		427	275	495		306	531	411		36	35	28						64	77	31

## Sheet: Fig. 2a
Chain A	3 layer	6 layer	9 layer	12 layer
305	2.0096	11.5199	6.83058	12.9287
306	14.1117	32.2649	25.513	41.2847
307	21.1268	37.4186	47.5962	81.7898
308	-10.8562	-0.20011	22.5536	27.4215
309	16.4037	-7.98573	-18.0717	-49.0497
310	0.32858	-7.15424	-6.41961	-17.2724
311	18.7225	22.6853	15.7866	25.0436
312	-1.86837	15.11	21.4781	34.5645
313	18.3231	28.1237	42.4247	31.8674
314	-17.9813	-36.0054	-39.6583	-76.3394
315	14.3666	20.3983	18.6842	51.6786
316	1.05092	1.72831	-10.1117	-11.0143
317	-2.97021	-20.2447	-10.6164	-45.4555
318	10.4077	16.7471	26.0992	32.7211
319	6.00026	2.19323	4.6886	6.85966
320	13.313	-1.32854	-4.87075	-5.50644
321	0	0	0	0
322	-2.05488	-17.9087	-18.7827	-25.5589
323	0.675225	4.00358	0.725169	0.561597
324	8.73147	35.5986	35.1242	52.7759
325	17.9471	30.3011	27.8228	36.1494
326	0.237864	2.56839	11.5892	17.452
327	9.73672	36.0639	53.8961	72.7112
328	16.6902	-1.38696	-3.57776	25.1858
329	16.0017	18.449	26.987	41.6076
330

## Sheet: Fig. 2b
Chain B	3 layers	6 layers	9 layers	12 layers
305	-11.7058	-16.6619	2.11609	10.3916
306	3.81245	11.3883	32.8034	45.1513
307	8.29527	22.7665	21.634	12.9668
308	20.7896	21.7513	53.4692	75.7361
309	8.29445	12.0202	27.0394	42.5478
310	-4.01463	-18.879	-19.5644	-41.2253
311	1.30078	-2.88637	-16.1337	-19.2929
312	-32.1884	-13.0711	-23.2471	-12.7146
313	-28.4162	-1.54368	-4.72103	-11.0101
314	-22.5147	-34.1967	-23.2303	-31.4059
315	-9.31249	2.48296	4.69998	18.2647
316	3.59792	-8.83052	-4.8202	-5.91259
317	-2.0744	9.82294	2.75859	11.2064
318	5.92618	19.8668	30.1585	54.451
319	-0.5643	-26.579	-22.957	-29.7028
320	-1.44006	-49.9212	-35.859	-64.3248
321	-10.425	-32.7905	-50.0669	-53.4672
322	0	0	0	0
323	-6.77084	-10.8104	-18.8132	-24.7912
324	-4.01173	-11.8134	-15.4693	-30.0279
325	-3.58696	-7.26613	7.73392	4.25758
326	-13.8857	-21.2134	-49.6794	-58.6029
327	-8.64723	-21.2753	-23.5557	-25.5512
328	17.1819	29.101	43.9737	55.8018
329	-0.4395	20.5261	32.5697	49.0384
330	-0.75527	20.2955	29.4116	43.1721

## Sheet: Fig. 2c,d
Chain B	9 layers	Chain A	9 layer
305	2.11609	305	6.83058
306	32.8034	306	25.513
307	21.634	307	47.5962
308	53.4692	308	22.5536
309	27.0394	309	-18.0717
310	-19.5644	310	-6.41961
311	-16.1337	311	15.7866
312	-23.2471	312	21.4781
313	-4.72103	313	42.4247
314	-23.2303	314	-39.6583
315	4.69998	315	18.6842
316	-4.8202	316	-10.1117
317	2.75859	317	-10.6164
318	30.1585	318	26.0992
319	-22.957	319	4.6886
320	-35.859	320	-4.87075
321	-50.0669	321	0
322	0	322	-18.7827
323	-18.8132	323	0.725169
324	-15.4693	324	35.1242
325	7.73392	325	27.8228
326	-49.6794	326	11.5892
327	-23.5557	327	53.8961
328	43.9737	328	-3.57776
329	32.5697	329	26.987
330	29.4116	330

## Sheet: Fig. 2e,f
t1/2 max
		10 uM			15 uM			20 uM
no TCEP (-)		22.08	21.95	19.99	9.9	11.74	14.41	13.2	10.8
+ TCEP		8.74	7.5	10.1	7.1	6.45	7.6	5.5	6.5	4.7
C322S		6.97	7.57	6.61	6.6	6.08	6.09	5.3	5.8	5.9
Fluorescence Intensity (A.U.)
		10 uM			15 uM			20 uM
no TCEP (-)		35.91	37.05	29.64	89.88	81.15	61.88	38.56	46.18	28
+ TCEP		142.9	113.7	89.49	151.2	192.4	148.1	302	222.3	166.7
C322S		353.9	462.3	260.8	527.7	377.3	602.4	410.7	638.5	504.4

## Sheet: Fig. 3c + Supp. Fig.  6a-d
	3 days			7 days			14 days
S320F (red) 60	17.9	27	18	5.5	5.6	7.4	1.8	2.7	2.4
S320F (red) 80	16.3	12	14	9.5	7.7	8	3.1	5.3	3.7
S320F (red) 100	11.8	19	14	6.7	7.1	8.2	5.6	3.2	2.7
S320F (red)160	13.6	23	9.1	11	9	11	3.1	2.9	3.4
S320F (-) 60	32	46.4	39.1	8.54	7.73	7.8	9.41	9.17	9.89
S320F (-) 80	45.1	23.4	22.4	10.3	10.8	11	8.78	13.1	11.1
S320F (-) 100	23	22.3	23.3	9.34	11.6	12.2	9.35	8.54	9.8
S320F (-) 160	27.8	33.6	27.8	14.6	17.4	12.3	15.1	18.9	14.4
S320F C322S 60	75.6	83	78	69	45	45	31	32	31
S320F C322S 80	68.6	64	58	52	50	55	34	36	37
S320F C322S 100	53.9	63	84	51	51	56	41	42	35
S320F C322S 160	50	51	45	61	61	62	42	45	43
control	0.63	0.2	0.3	0.6	0.2	0.3	0.6	0.2	0.3

## Sheet: Fig. 3d + Supp. Fig. 6e-h
		3 days			7 days			14 days
S320F (red) 80nm		0.8	0.6	0.7	2.1	0.6	0.5	1.2	0.4	0.5
S320F (red) 100nm		0.5	0.6	0.7	0.4	0.3	0.3	0.4	0.3	0.5
S320F (red) 200nm		0.7	0.6	0.7	0.4	0.4	0.4	0.4	0.6	0.5
S320F (red) 300nm		0.9	1.6	1.5	0.5	0.9	2.7	0.7	1.1	4.6
S320F (-) 80nm		1.4	0.47	0.28	1.53	0.26	0.18	1.45	0.6	0.53
S320F (-) 100nm		0.28	0.39	0.25	0.27	0.22	0.25	0.52	0.37	0.45
S320F (-) 200nm		0.39	0.22	0.29	0.41	0.35	0.35	0.55	0.5	0.33
S320F (-) 300nm		0.48	0.47	1.25	0.44	0.71	2.26	0.54	0.73	2.72
S320F C322S 80nm		2	0.9	0.8	3.2	4.1	2.2	3.1	1.8	1.1
S320F C322S 100nm		1.4	0.8	0.9	2	2.1	0.8	1.2	1.1	1.8
S320F C322S 200nm		1.2	1.2	0.9	1.5	2.4	3.1	2.3	1.6	2.3
S320F C322S 300nm		1.2	1.5	1.9	2.9	2.9	5.3	2.5	2.6	4.1
no treatment		0.3	0.4	0.2	0.3	0.4	0.2	0.3	0.4	0.2

## Sheet: Fig. 3f + Supp. Fig. 8a
All with TCEP		Day 3			Day 7			Day 14
5nM S320F		76.5	76	73.2	78.5	74.2	79.3	81.6	74.1	78.4
10nM S320F		79	80.6	81.3	78.4	76.4	79.9	75.9	81.3	78.3
20nM S320F		79.8	83.2	81.4	76.5	78.7	80	79.8	80.7	80.4
40nM S320F		81.7	80.5	77	69.5	79.2	77.2	81	79	78.1
5nM S320F_C291S		63.6	62.7	65.5	80.8	79.9	79.1	58.2	58.6	62.8
10nM S320F_C291S		72.7	69.6	71.5	85.6	79.4	73.4	64.7	51.9	63.1
20nM S320F_C291S		75.5	80.8	79.3	80.8	83.4	84.1	70.6	69.3	71.3
40nM S320F_C291S		78.3	72.2	84.3	83.3	83.1	82.1	74.5	68.1	64.4
5nM S320F_C322S		82.1	82.4	84.3	73.9	81.1	82.9	82.2	84.3	85.5
10nM S320F_C322S		86.3	84.8	85.4	84.5	76.5	79.4	87.5	85.1	87.3
20nM S320F_C322S		81.1	87.3	81.2	83.1	83.6	84.2	85.8	88.9	88.9
40nM S320F_C322S		87.1	78.1	78.3	85.7	81	80.2	90.7	85	84.2
5nM S320F_C291S_C322S		76.1	79.8	69.5	68.6	74.8	65	51.2	50	50.1
10nM S320F_C291S_C322S		84.6	77.3	82.8	70.7	73.1	75.9	54.8	53.9	64.6
20nM S320F_C291S_C322S		83.4	78.9	81.8	76.3	77	77.1	68.4	69	70.2
40nM S320F_C291S_C322S		87.4	83.7	86.1	75.3	77.4	77.5	78.2	68.4	60.9
Lipo-OptiMEM		0.27	0.09	0.18	0.27	0.09	0.18	0.27	0.09	0.18
No treatment		0.76	0.57	0	0.76	0.57	0	0.76	0.57	0

## Sheet: Fig. 3g + Supp. Fig. 8b
All with TCEP		Day 3			Day 7			Day 14
80nM S320F		14.8	15.3	16.3	18.2	22.5	21.6	8.58	9.55	9.95
100nM S320F		16.2	15.1	17.5	30.8	27.7	27.6	11	11.7	11.4
200nM S320F		17.8	21.6	21.9	32.5	30.9	30.2	20.3	20.5	17.8
300nM S320F		18.6	16.9	22.3	24.5	27.6	34.3	10.9	15.7	21.3
80nM S320F_C291S		12.3	1.52	8.75	0.49	0.53	0.47	1.53	1.27	0.57
100nM S320F_C291S		7.96	7.41	4.11	1.11	1.37	1.13	1.88	1.59	1.42
200nM S320F_C291S		6.43	6.19	9.42	1.27	2.35	0.97	2.68	2.44	2.65
300nM S320F_C291S		4.45	12.2	9.2	1.27	2.29	2.43	2.47	3.93	3.19
80nM S320F_C322S		17.5	13.5	15.2	5.38	6.24	7.18	6.29	6.55	8.53
100nM S320F_C322S		17.2	16	19.3	6.75	5.31	7	10	8.46	10.4
200nM S320F_C322S		16.6	23.4	29.4	11.5	16	12.7	13.2	13.9	15.8
300nM S320F_C322S		24.5	25	27.5	14	17.3	17.3	12.9	12.6	9.85
80nM S320F_C291S_C322S		8.7	11.4	9.99	4.31	3.2	4.18	3.16	1.97	2.22
100nM S320F_C291S_C322S		13.2	9.91	13	4.13	3.94	4.88	2.05	1.99	4.17
200nM S320F_C291S_C322S		15.2	15.7	13.5	8.89	7.12	6.95	2.67	2.8	2.92
300nM S320F_C291S_C322S		16.3	17	17.4	7.35	7.77	11.6	2.16	4.48	3.06
No treatment		0	0	0	0	0	0	0	0	0

[truncated: 9 more sheets: Fig. 4b, Fig. 4e, Supp. Fig. 9b,c, Supp. Fig. 9d,e, Supp. Fig. 10, Fig. 5b,c + Supp. Fig. 15b, Fig. 5e, Fig. 5f + Supp. Fig. 15c , Fig. 5g]
